# Supplementary material for: Comparison of deep learning systems and cornea specialists in detecting corneal diseases from low-quality images
Source: PubMed Central journal article supplement — iScience. 2021 Oct 22;24(11):103317. doi: 10.1016/j.isci.2021.103317 (PMC8577078; doi:10.1016/j.isci.2021.103317), 2021-10-22
Supplement: mmc1.pdf [file mmc1.pdf]

**iScience, Volume 24**

**Supplemental information**

**Comparison of deep learning systems  
and cornea specialists in detecting  
corneal diseases from low-quality images**

**Zhongwen Li, Jiewei Jiang, Wei Qiang, Liufei Guo, Xiaotian Liu, Hongfei Weng, Shanjun Wu, Qinxiang Zheng, and Wei Chen**

## Supplementary Information

- 1. Figure S1. Performance of the NDLS and PEDLS in high-quality images from the external test dataset.** a, Receiver operating characteristic curves of the NDLS and PEDLS for classifying keratitis, other corneal abnormalities, and normal cornea in high-quality images. b, Confusion matrixes of the NDLS and PEDLS in high-quality images. NDLS, new deep learning system. PEDLS, previously established deep learning system.
- 2. Figure S2. Visualization of the separability of embedding features learned by the NDLS and PEDLS in the external text dataset.** a, Low-quality images. b, High-quality images. NDLS, new deep learning system. PEDLS, previously established deep learning system.
- 3. Figure S3. Flow diagram of the development and assessment of the NDLS.** NDLS, new deep learning system. NEH, Ningbo Eye Hospital.
- 4. Table S1. Comparison of the PEDLS with the NDLS in high-quality images.**

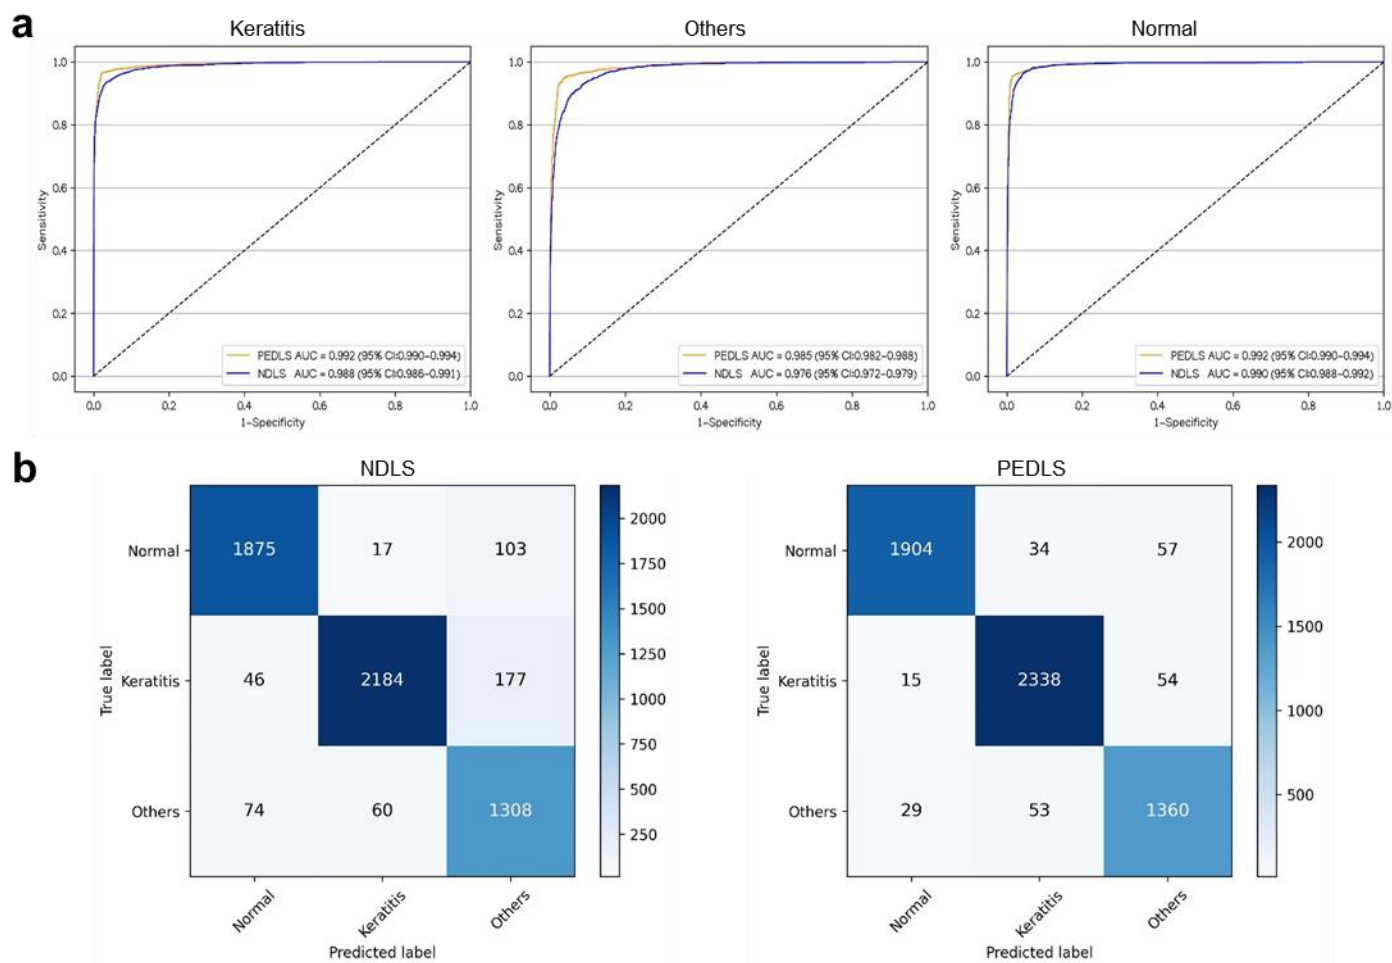

**Figure S1. Performance of the NDLS and PEDLS in high-quality images from the external test dataset.** a, Receiver operating characteristic curves of the NDLS and PEDLS for classifying keratitis, other corneal abnormalities, and normal cornea in high-quality images. b, Confusion matrixes of the NDLS and PEDLS in high-quality images. NDLS, new deep learning system. PEDLS, previously established deep learning system.

## a. Low-quality images

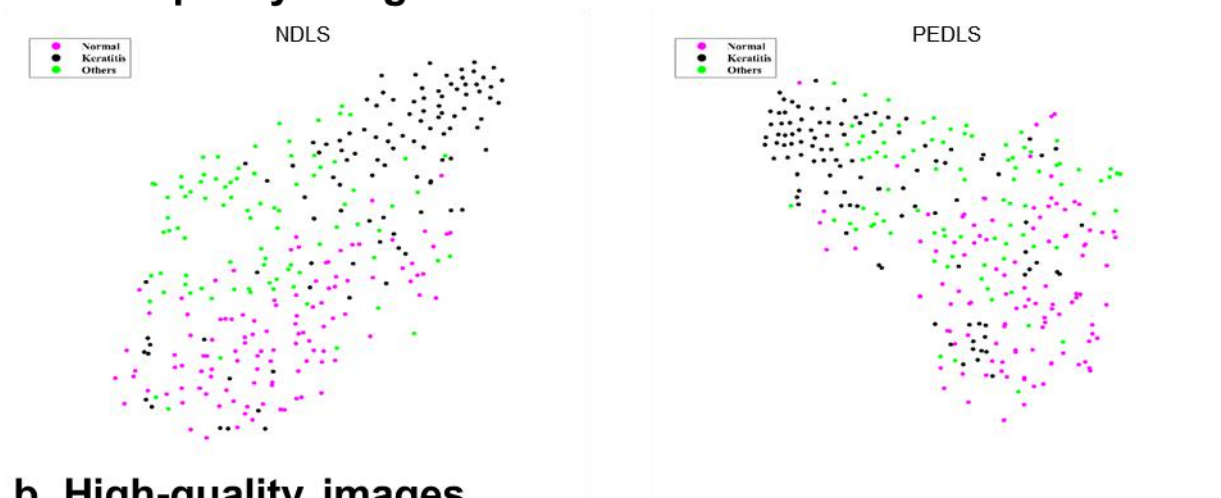

## b. High-quality images

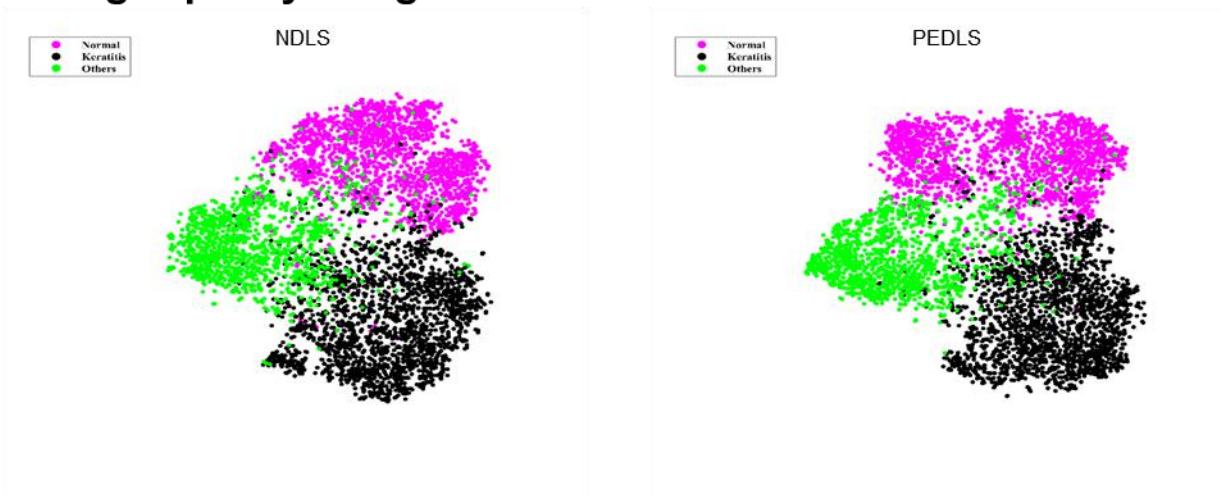

**Figure S2. Visualization of the separability of embedding features learned by the NDLS and PEDLS in the external text dataset. a, Low-quality images. b, High-quality images. NDLS, new deep learning system. PEDLS, previously established deep learning system.**

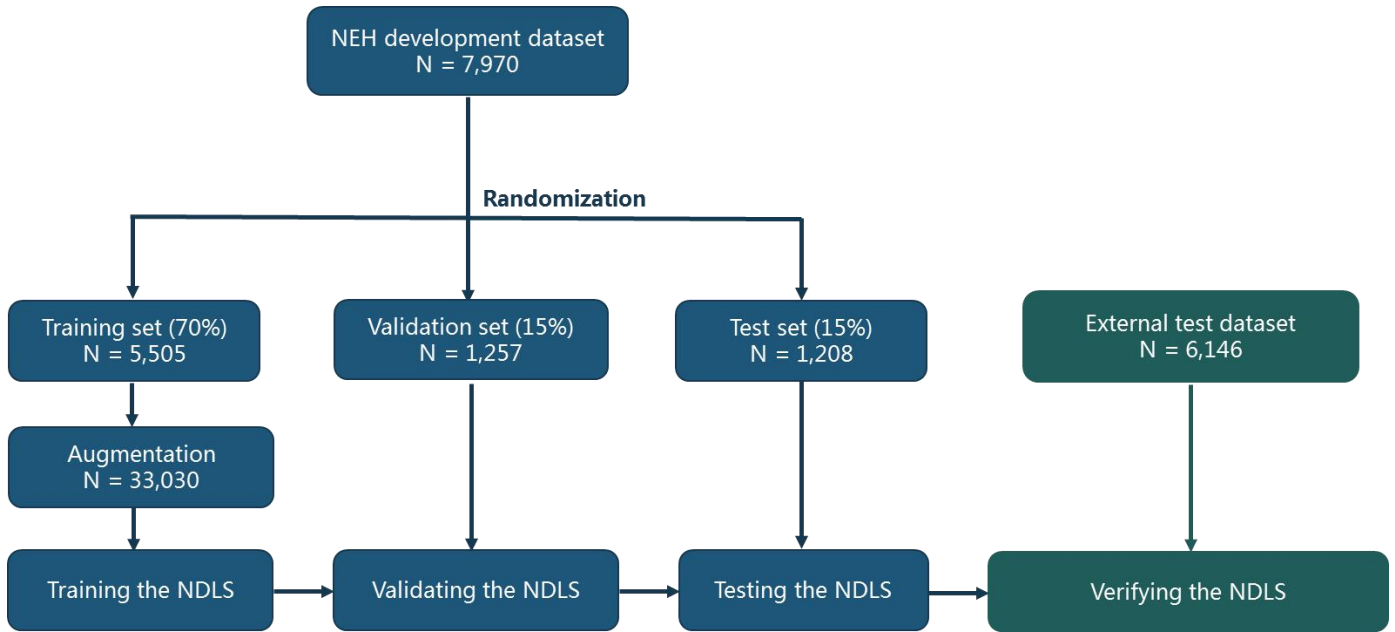

**Figure S3. Flow diagram of the development and assessment of the NDLS.** NDLS, new deep learning system. NEH, Ningbo Eye Hospital.

**Table S1. Comparison of the PEDLS with the NDLS in high-quality images.**

| One-vs.-Rest Classification          | PEDLS             | NDLS              | <i>P</i> |
|--------------------------------------|-------------------|-------------------|----------|
| <b>Keratitis vs. others + normal</b> |                   |                   |          |
| Sensitivity (95% CI)                 | 97.1% (96.5-97.8) | 90.7% (89.6-91.9) | <0.001   |
| Specificity (95% CI)                 | 97.5% (96.9-98.0) | 97.8% (97.3-98.3) | 0.348    |
| Accuracy (95% CI)                    | 97.3% (96.9-97.7) | 94.9% (94.3-95.4) | <0.001   |
| <b>Others vs. keratitis + normal</b> |                   |                   |          |
| Sensitivity (95% CI)                 | 94.3% (93.1-95.5) | 90.7% (89.2-92.2) | <0.001   |
| Specificity (95% CI)                 | 97.5% (97.0-97.9) | 93.6% (92.9-94.4) | <0.001   |
| Accuracy (95% CI)                    | 96.7% (96.2-97.2) | 92.9% (92.3-93.6) | <0.001   |
| <b>Normal vs. keratitis + others</b> |                   |                   |          |
| Sensitivity (95% CI)                 | 95.4% (94.5-96.4) | 94.0% (92.9-95.0) | 0.005    |
| Specificity (95% CI)                 | 98.9% (98.5-99.2) | 96.9% (96.3-97.4) | <0.001   |
| Accuracy (95% CI)                    | 97.7% (97.3-98.1) | 95.9% (95.4-96.4) | <0.001   |

“Others” denotes other corneal abnormalities. “Normal” denotes normal cornea. NDLS, new deep learning system. PEDLS, previously established deep learning system. CI, confidence interval.
